# Supplementary material for: Modulation of a coordination structure in a europium(iii)-based metallo-supramolecular polymer for high proton conduction
Source: Royal Society of Chemistry journal article supplement (doi:10.1039/c8ra07405d), 2018-01-01
Supplement: c8ra07405d1.pdf [file c8ra07405d1.pdf]

Electronic Supplementary Information for

**Modulation of a coordination structure in europium(III)-based metallo-supramolecular polymers for high proton conduction**

Yemineni S L V Narayana, Chanchal Chakraborty, Utpal Rana, Yoshikazu Ninomiya,  
Takefumi Yoshida and Masayoshi Higuchi\*

Electronic Functional Macromolecules Group, National Institute for Material Science  
(NIMS), Tsukuba 305-0044, Japan.

E-mail: HIGUCHI.Masayoshi@nims.go.jp

**Scheme S1. Synthetic scheme for L1 and L2**

**Fig. S1.  $^1\text{H}$  NMR spectrum of tetra ester derivative of L1.**

**Fig. S2.  $^{13}\text{C}$  NMR spectrum of tetra ester derivative of L1.**

**Fig. S3. MALTI-TOF spectrum of tetra ester derivative of L1.**

**Fig. S4.  $^1\text{H}$  NMR spectrum of L1.**

**Fig. S5. HR-Mass spectrum of L1.**

**Fig. S6. MALTI-TOF spectrum of L1.**

**Fig. S7.  $^1\text{H}$  NMR spectrum of L2.**

**Fig. S8.  $^{13}\text{C}$  NMR spectrum of L2.**

**Fig. S9. HR-Mass spectrum of L2.**

**Fig. S10. FT-IR Spectra of L1 and ester derivative of L1.**

**Fig. S11.  $^1\text{H}$  NMR spectrum of PolyEu-H.**

**Fig. S12.  $^1\text{H}$  NMR spectrum of PolyEu.**

**Fig. S13.  $^1\text{H}$  NMR spectrum of PolyEu-2.**

**Fig. S14. UV/Vis spectral change of L2 during the successive addition of  $\text{Eu}(\text{NO}_3)_3 \cdot 5\text{H}_2\text{O}$ .**

**Fig. S15. SEC-Viscometry-RALLS measurement of polymers.**

**Fig. S16. UV/Vis spectral change of ligands with their corresponding polymers.**

**Fig. S17. FT-IR Spectra of L1, PolyEu-H, PolyEu and  $\text{Eu}(\text{NO}_3)_3$**

**Fig. S18. Absorption changes of PolyEu-H on addition of triethylamine.**

**Fig. S19. AFM morphology of PolyEu-H.**

**Fig. S20. SEM images of PolyEu-H.**

**Fig. S21. AFM morphology of PolyEu.**

**Fig. S22. SEM images of PolyEu.**

**Fig. S23. AFM morphology of PolyEu-2.**

**Fig. S24. SEM images of PolyEu-2.**

**Fig. S25. Nyquist plot for proton conductivity of PolyEu at 95% RH.**

**Fig. S26. Nyquist plot and Activation energies of PolyEu-2 at 95% RH.**

**Fig. S27. Nyquist plot for proton conductivity of polymers at 30% RH.**

**Fig. S28. Nyquist plots for proton conductivity of polymers at 50% RH.**

**Fig. S29. Nyquist plots for proton conductivity of polymers at 70% RH.**

**Fig. S30. Activation energy at 70% RH for PolyEu and  $\log(\text{conductivity})$  vs % RH.**

**Fig. S31. The Nyquist plots of PolyEu-H and PolyEu-2 with different temperatures.**

**Fig. S32. Equivalent circuit diagram used for fitting of the Nyquist plots .**

**Fig. S33. Powder XRD data of PolyEu-H and PolyEu-2 before and after the impedance measurement**

**Table S1. Proton Conduction values of some reported porous crystalline Frameworks.**

**Table S2. Some known porous crystalline materials with very low activation energies.**

**Table S3. Proton Conduction and activation energies of reported europium-based MOFs.**

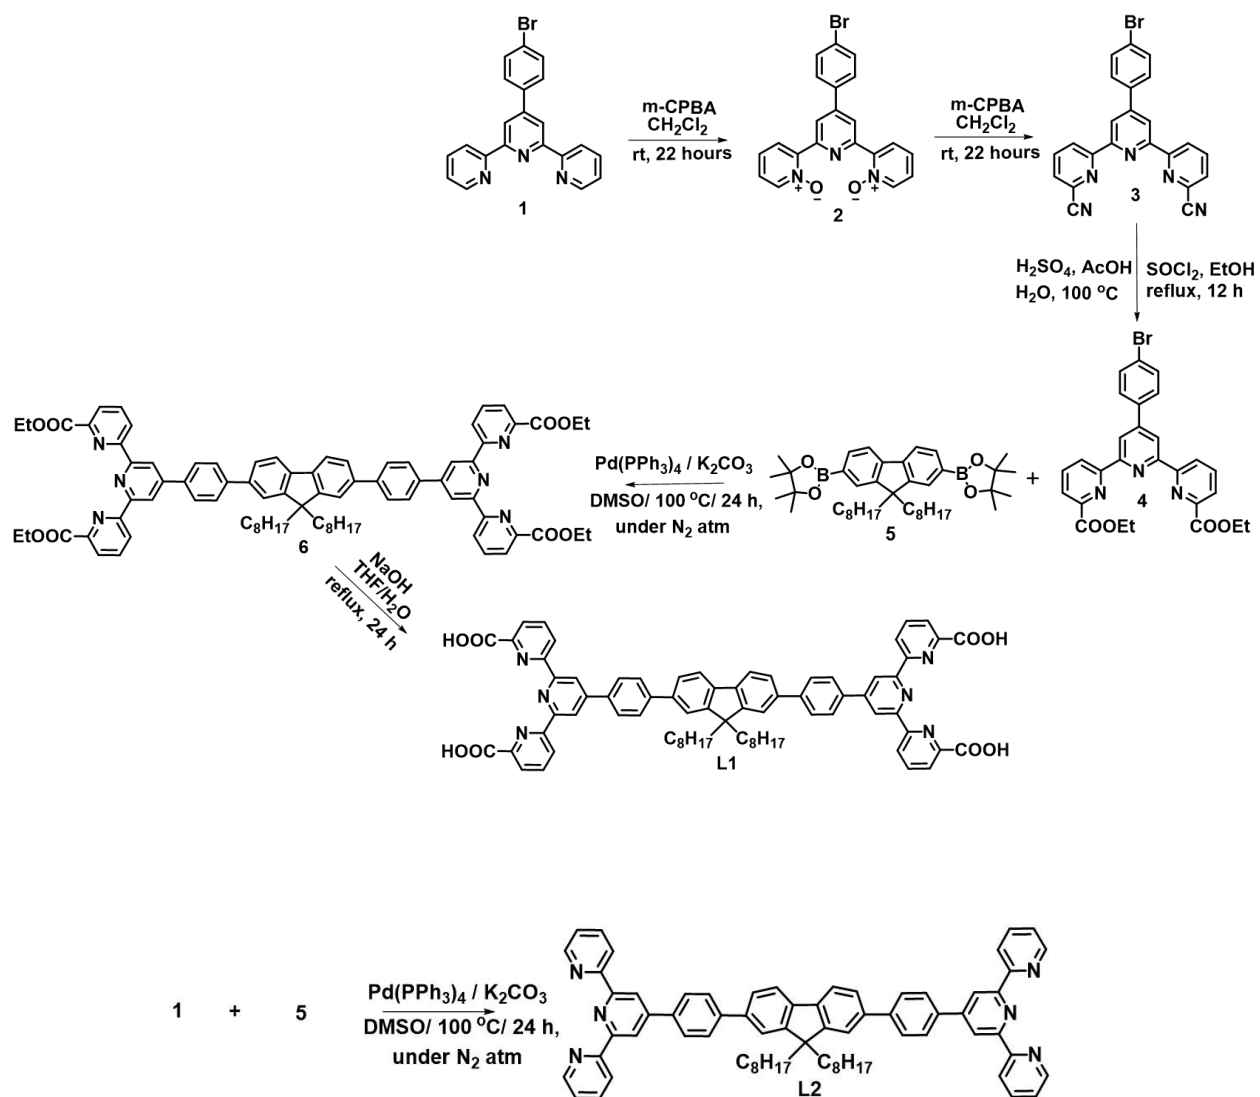

**Scheme S1.** Synthetic scheme for L1 and L2.

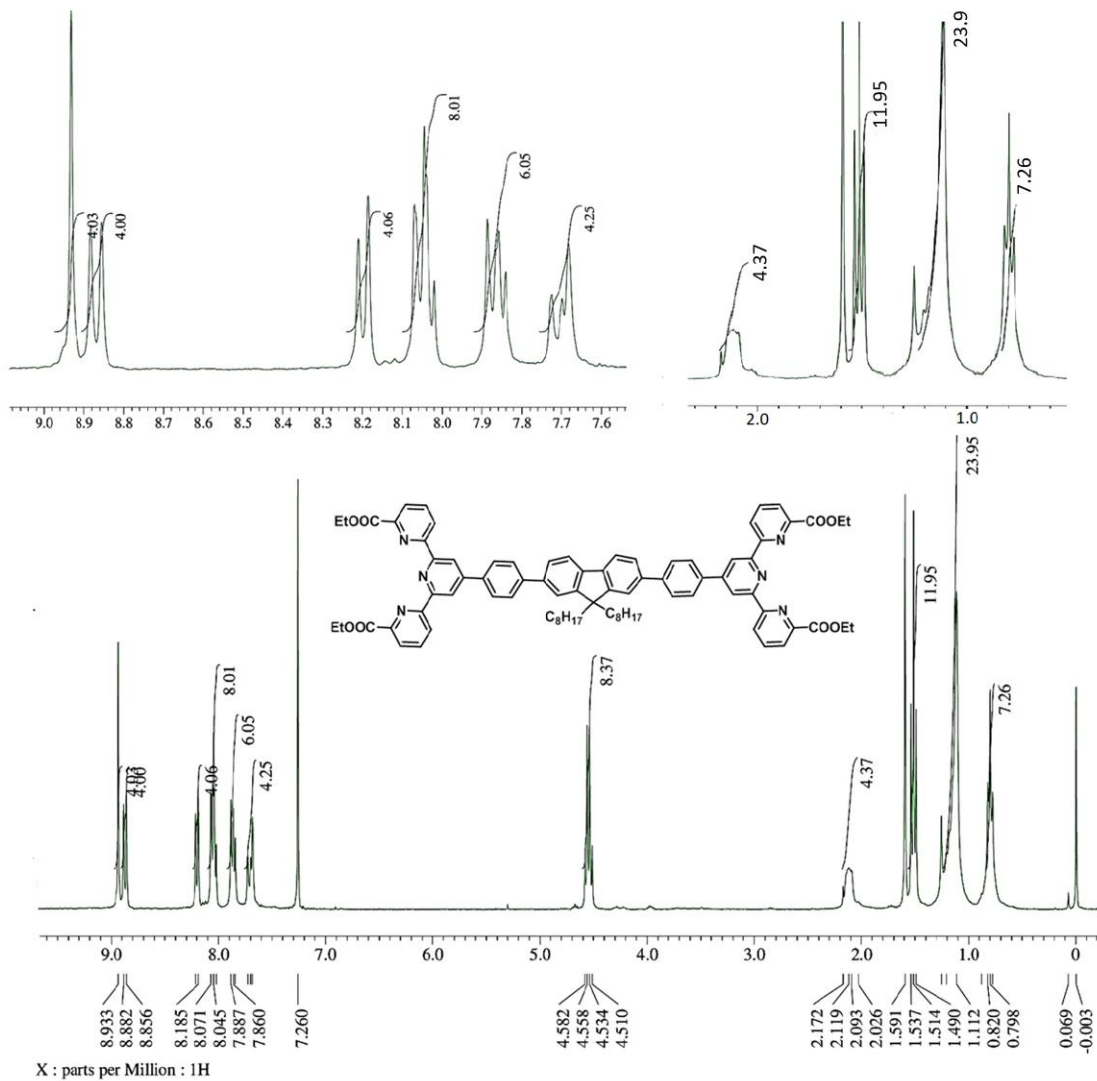

**Fig. S1.**  $^1\text{H}$  NMR spectrum of tetra ester derivative of L1.

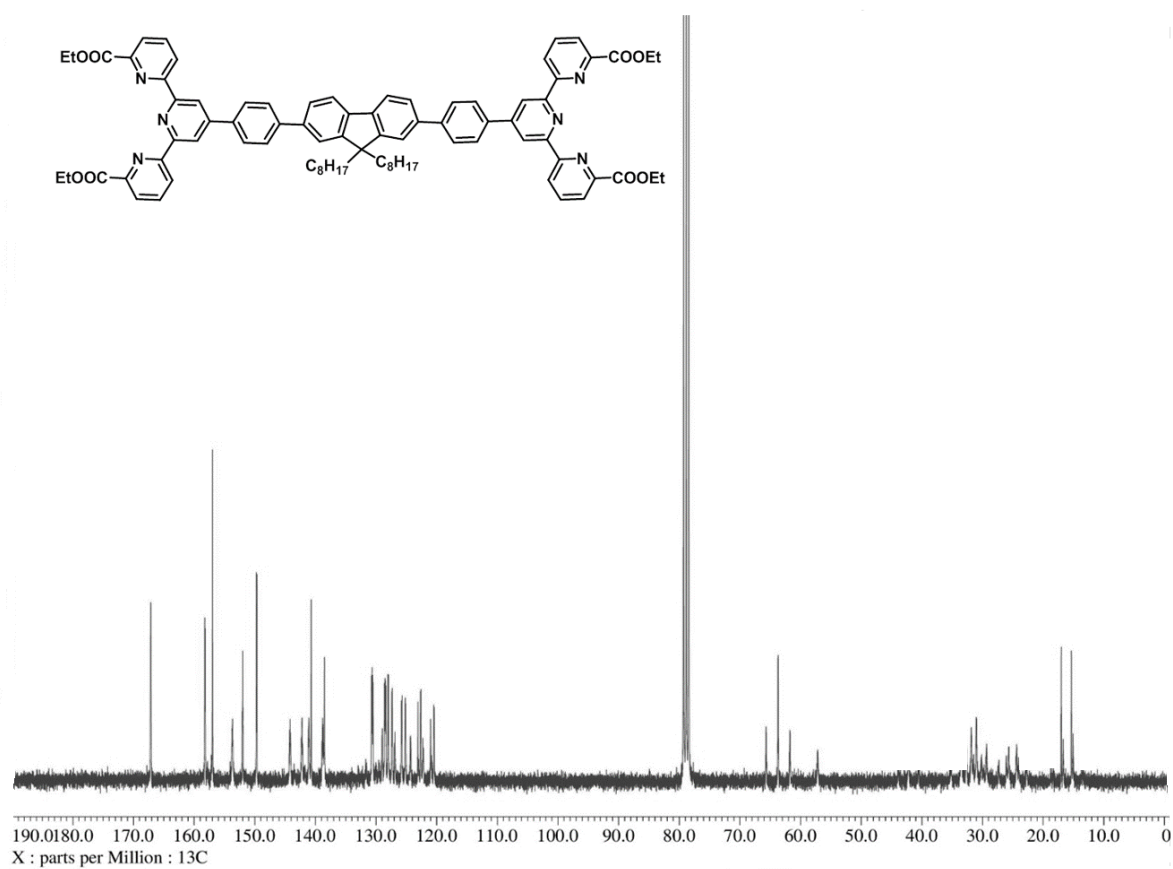

**Fig. S2.**  $^{13}\text{C}$  NMR spectrum of tetra ester derivative of L1.

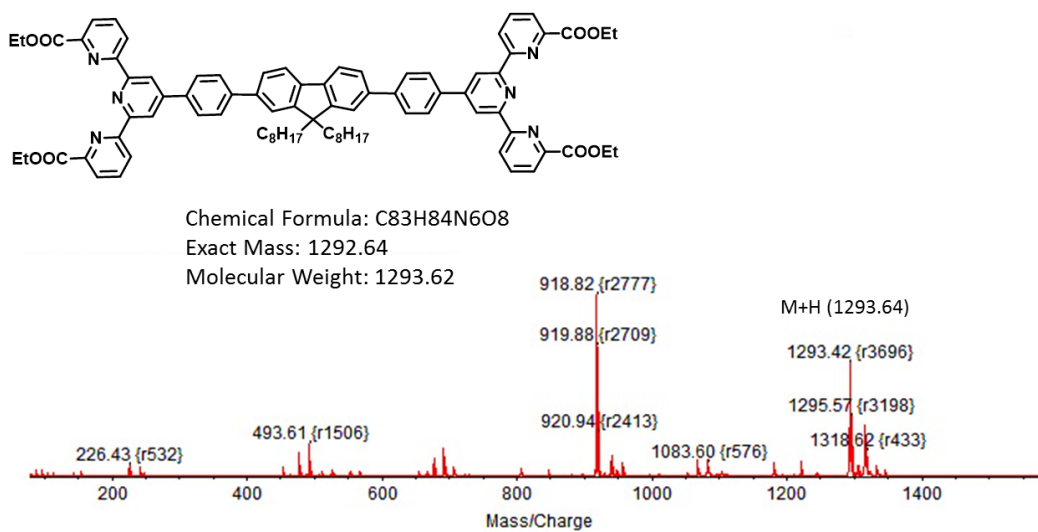

**Fig. S3.** MALDI-TOF spectrum of tetra ester derivative of L1.

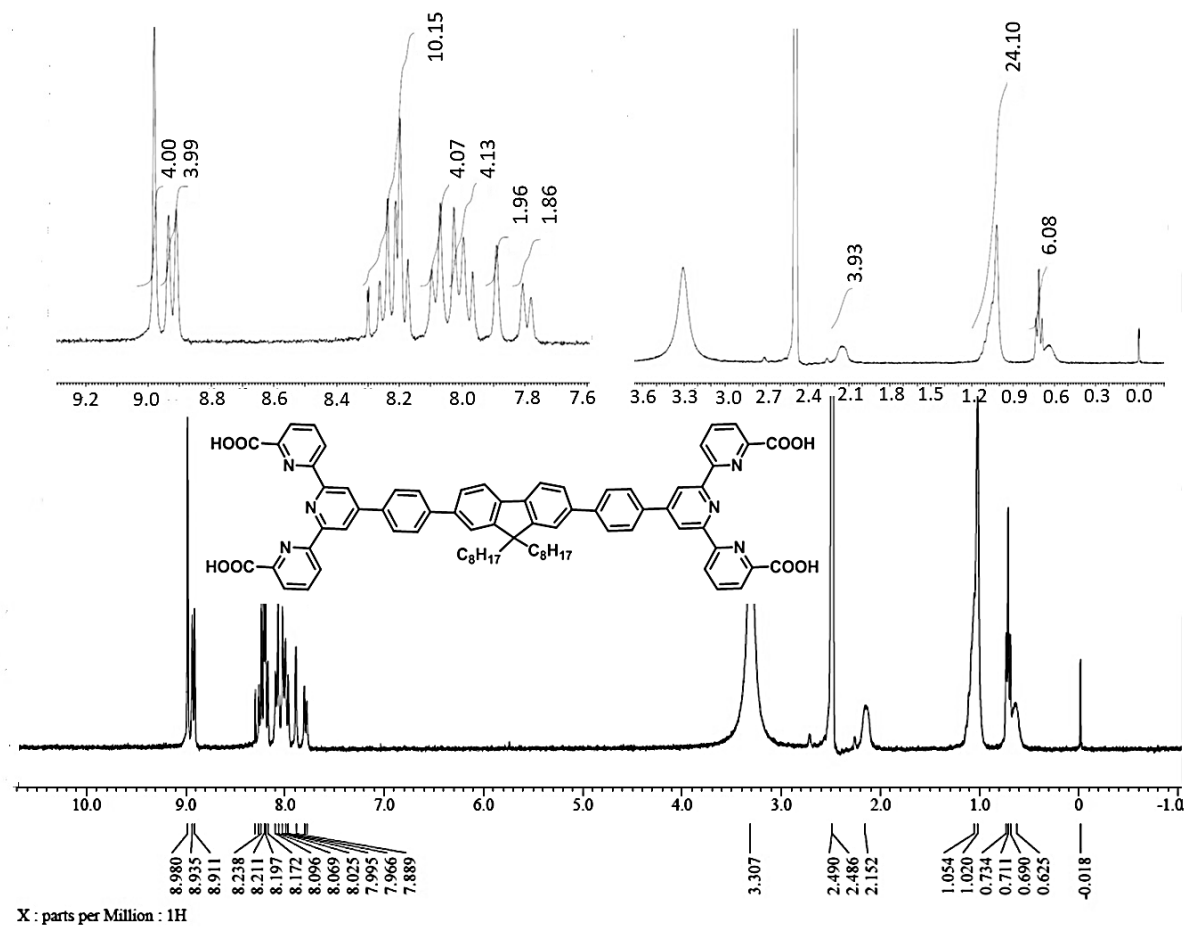

Fig. S4. <sup>1</sup>H NMR spectrum of L1.



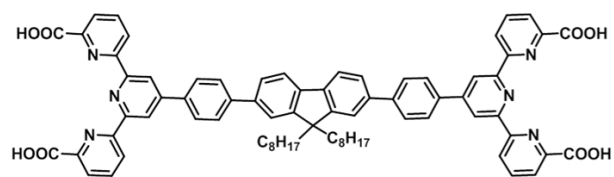

Chemical Formula: C<sub>75</sub>H<sub>68</sub>N<sub>6</sub>O<sub>8</sub>  
Exact Mass: 1180.51  
Molecular Weight: 1181.38

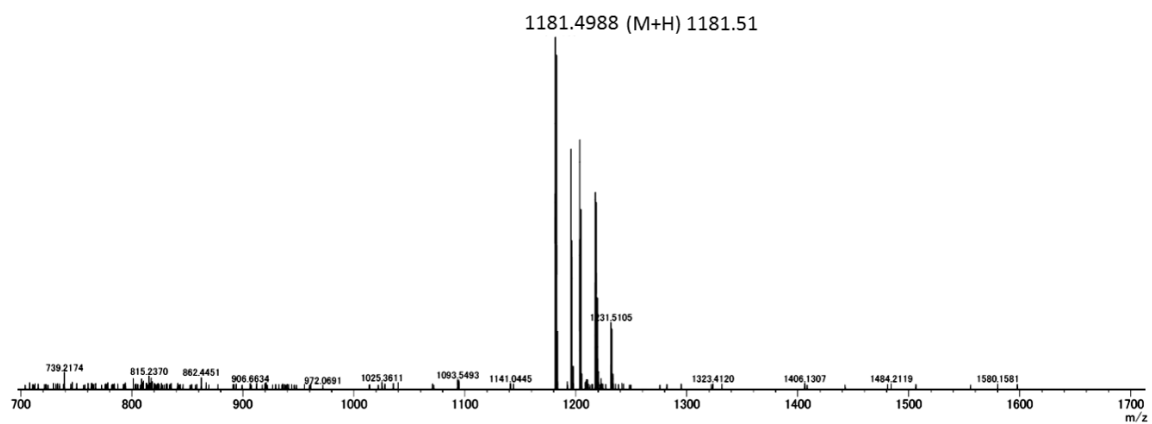

**Fig. S5.** HR-Mass spectrum of L1.

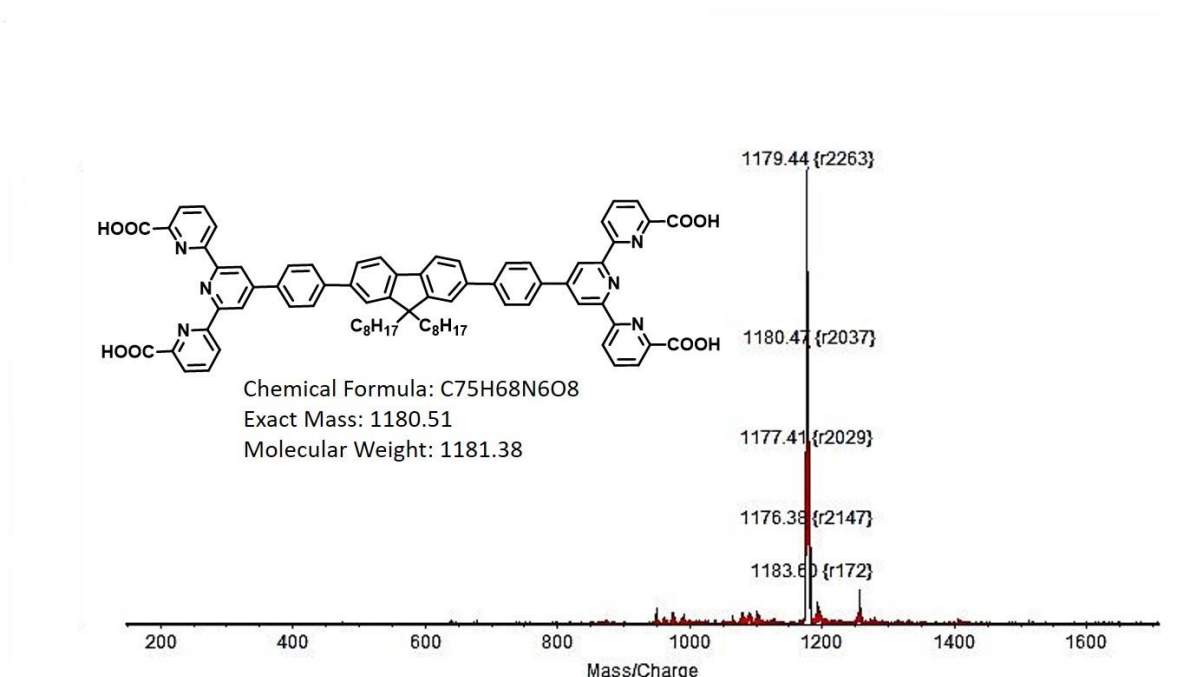

**Fig. S6.** MALDI-TOF spectrum of L1.

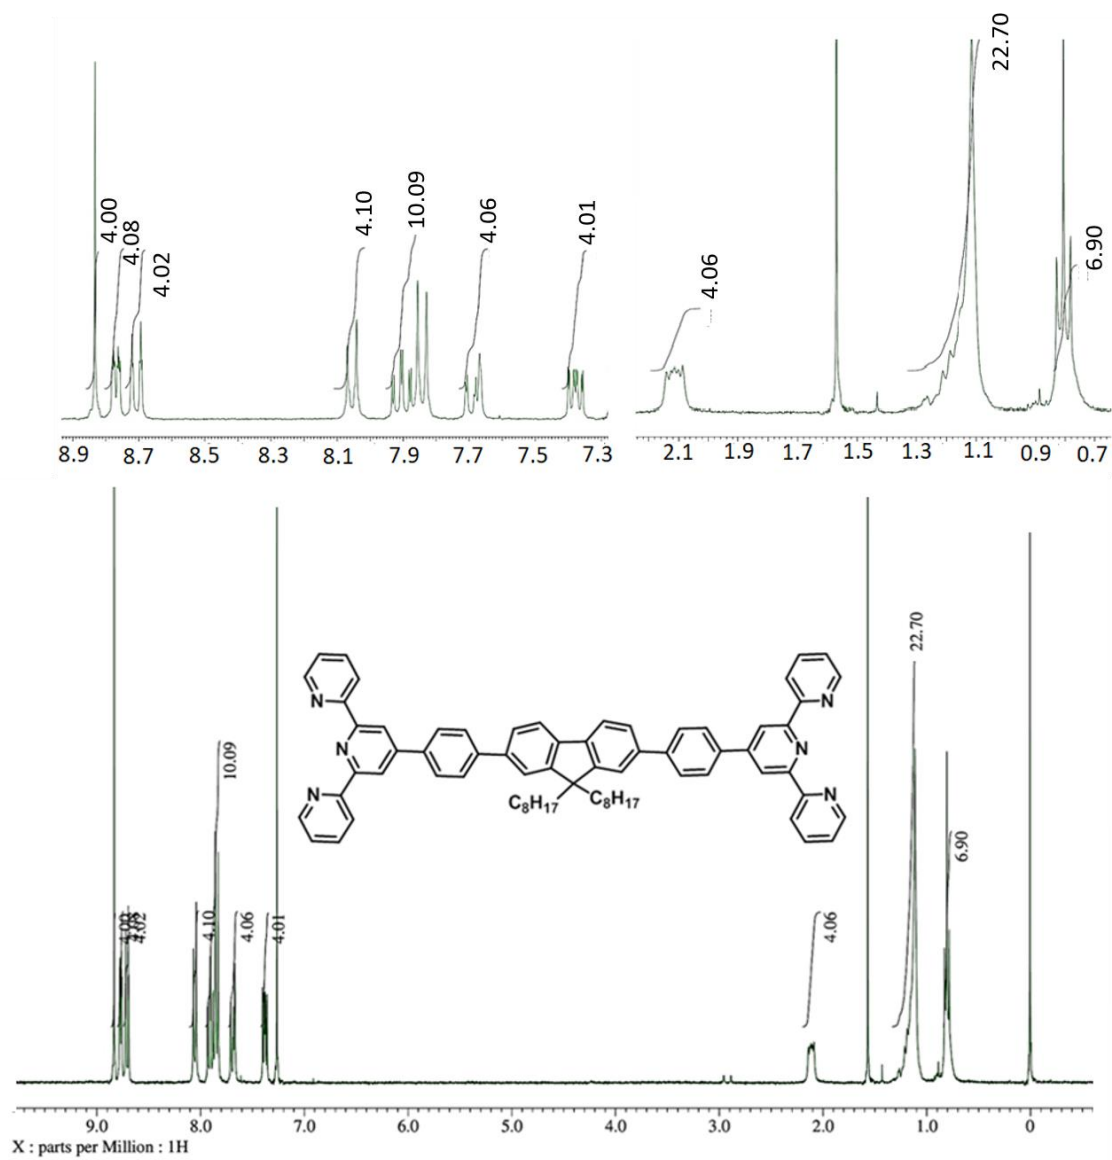

Fig. S7.  $^1\text{H}$  NMR spectrum of L2.

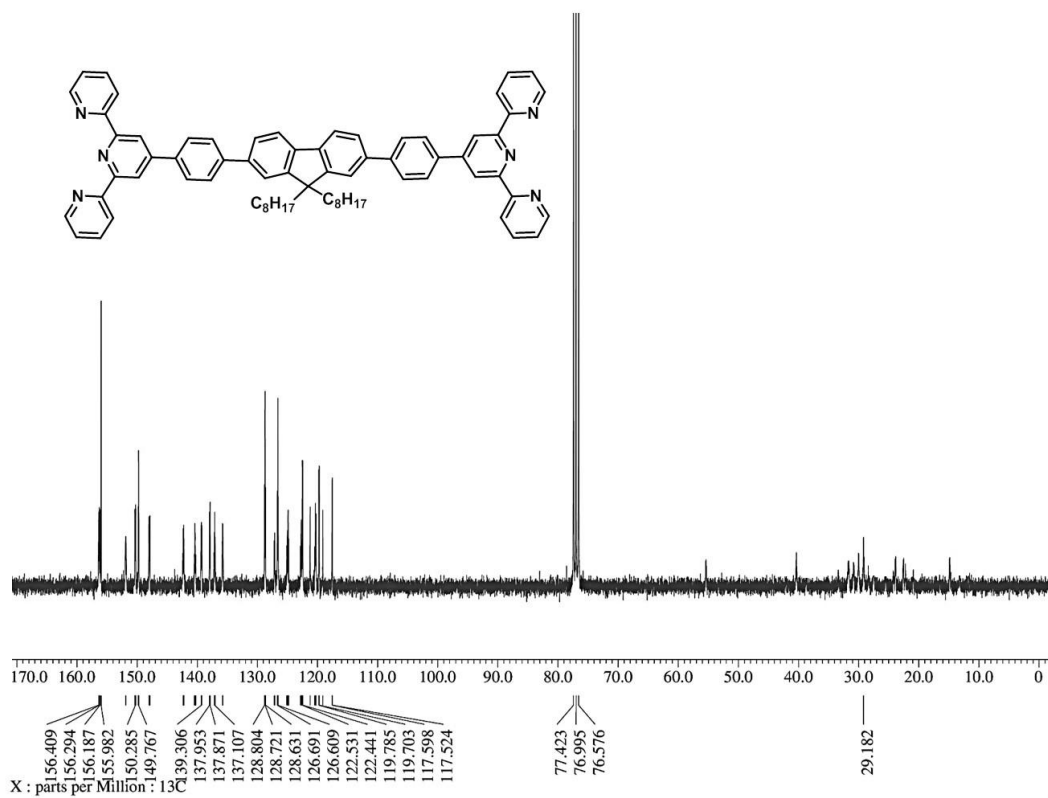

**Fig. S8.**  $^{13}\text{C}$  NMR spectrum of L2.

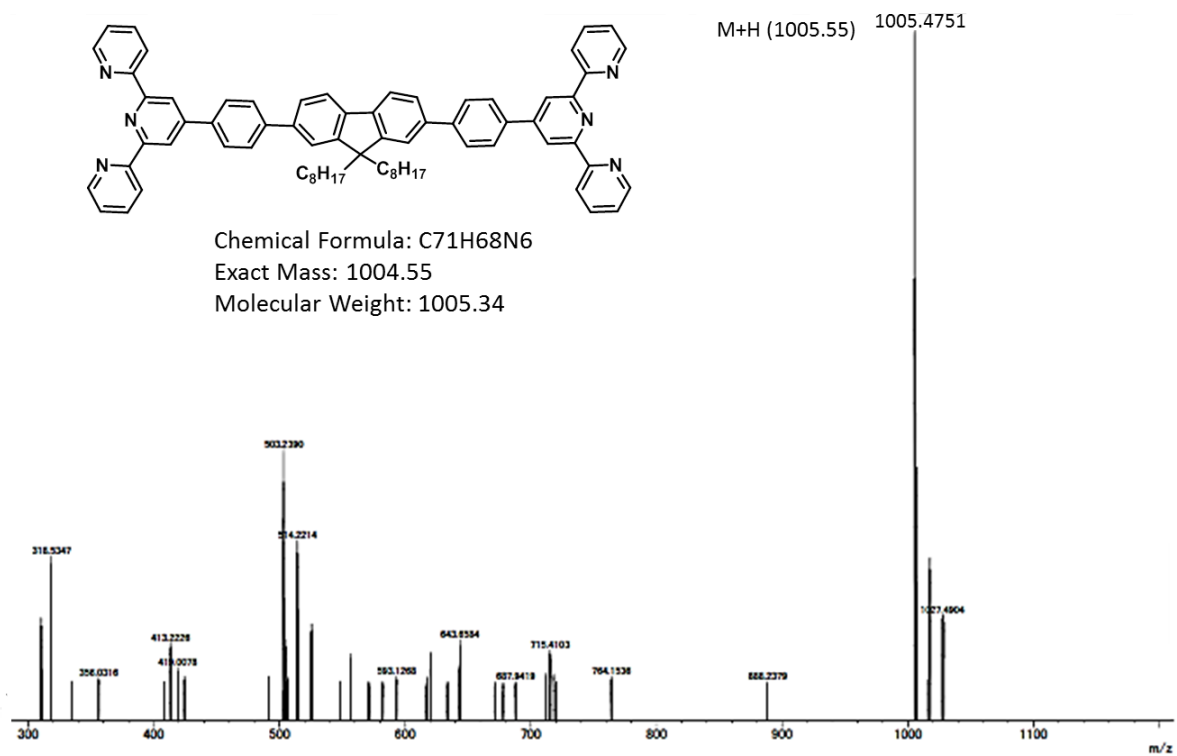

**Fig. S9.** HR- Mass spectrum of L2.

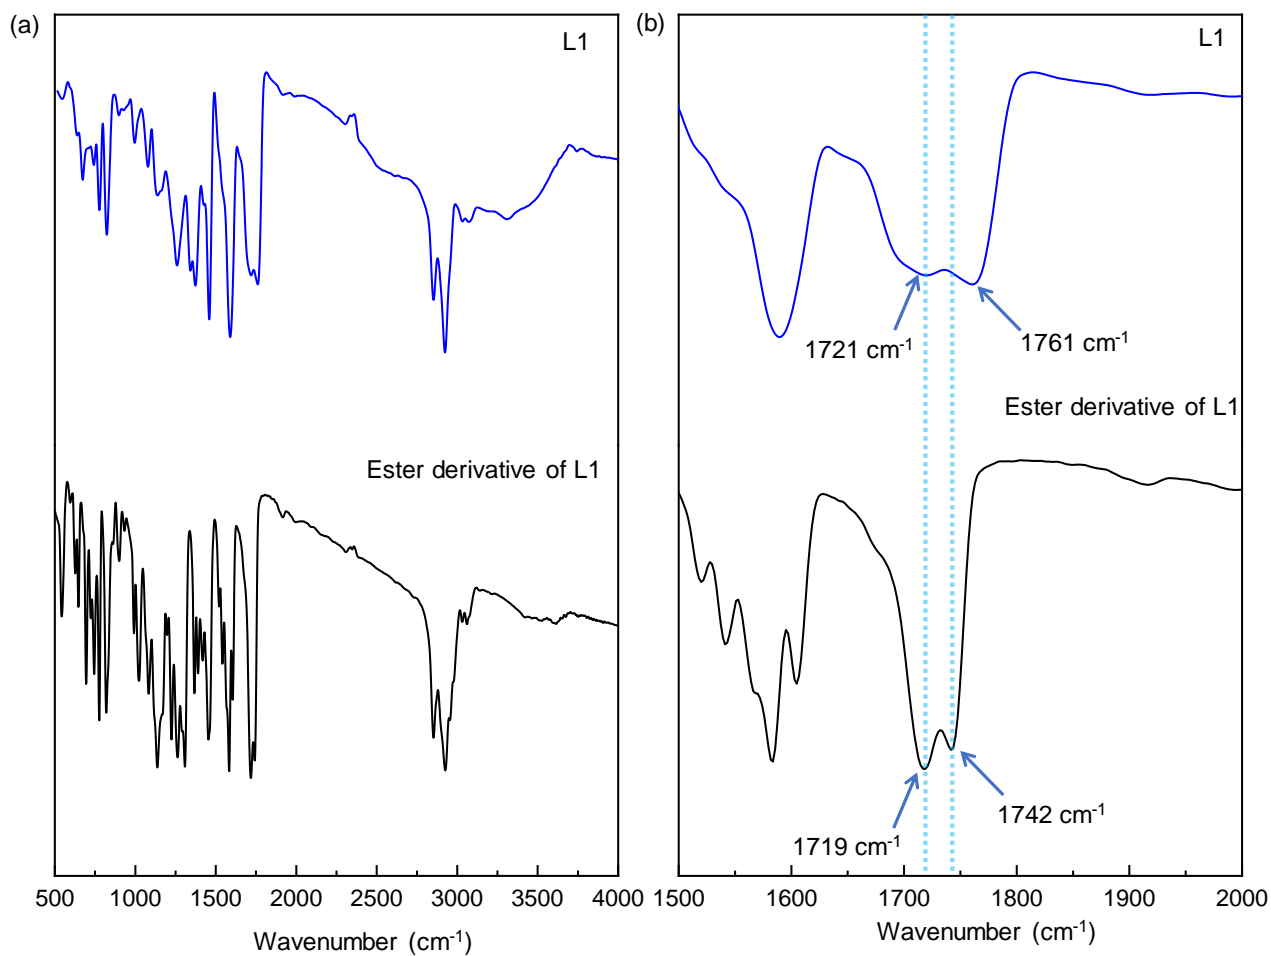

**Fig. S10.** FT-IR Spectra of L1 and ester derivative of L1. a) 500-4000  $\text{cm}^{-1}$  b) 1500-2000  $\text{cm}^{-1}$

We showed FT-IR spectra of L1 and ester derivative of L1 in Fig. S10. C=O stretching frequency in carboxylic acid is blue shifted compared with its ester derivative.

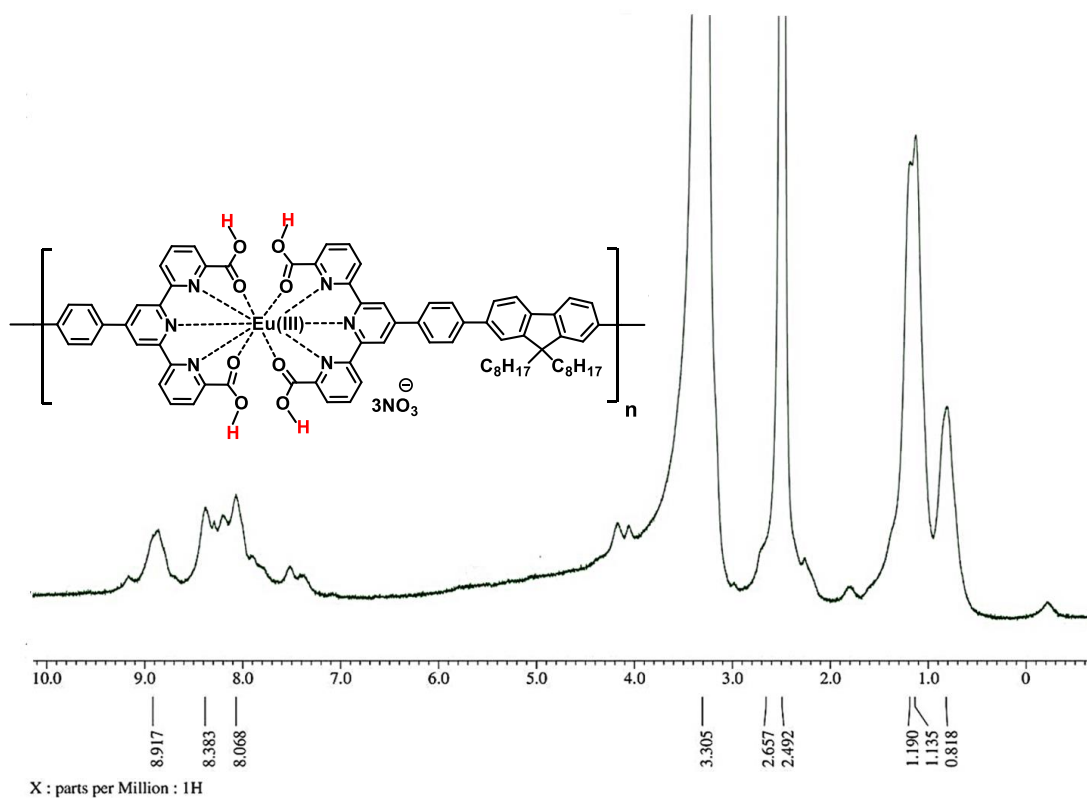

**Fig. S11.**  $^1\text{H}$  NMR spectrum of PolyEu-H.

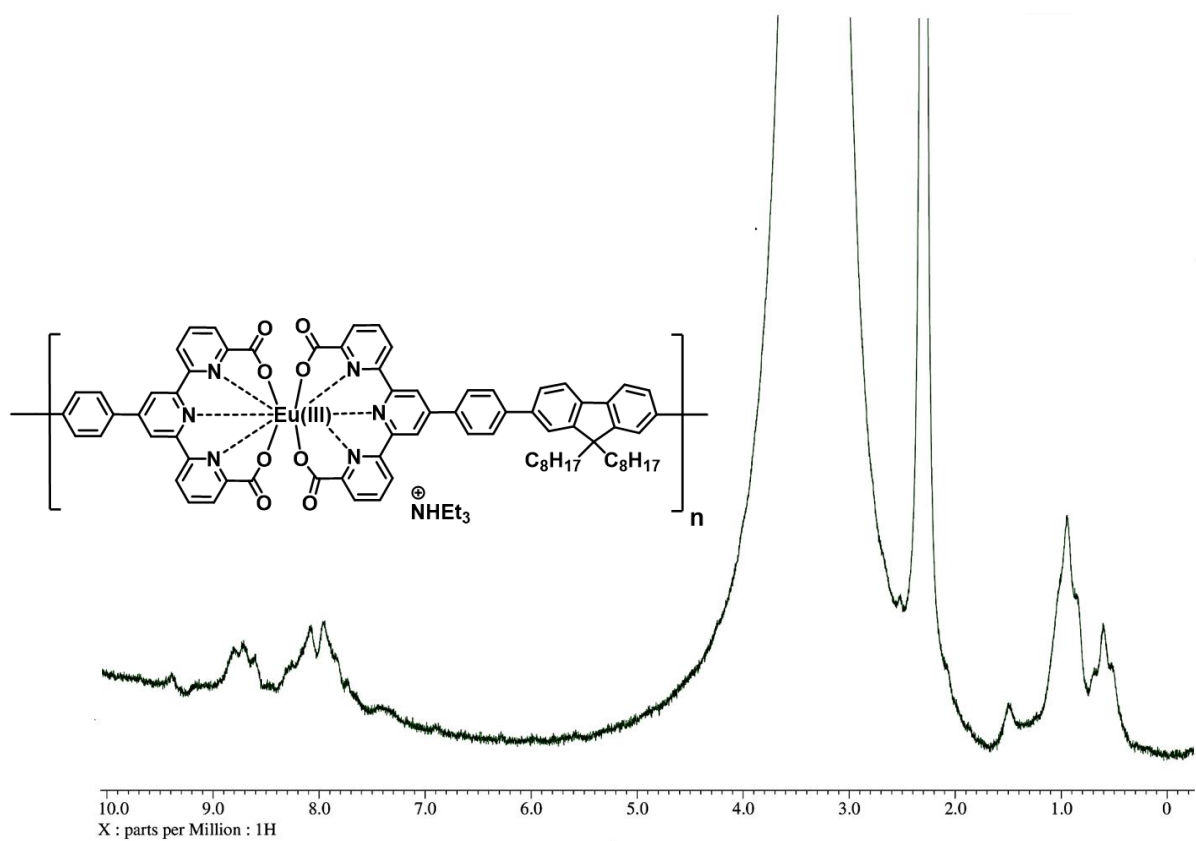

**Fig. S12.** <sup>1</sup>H NMR spectrum of PolyEu.



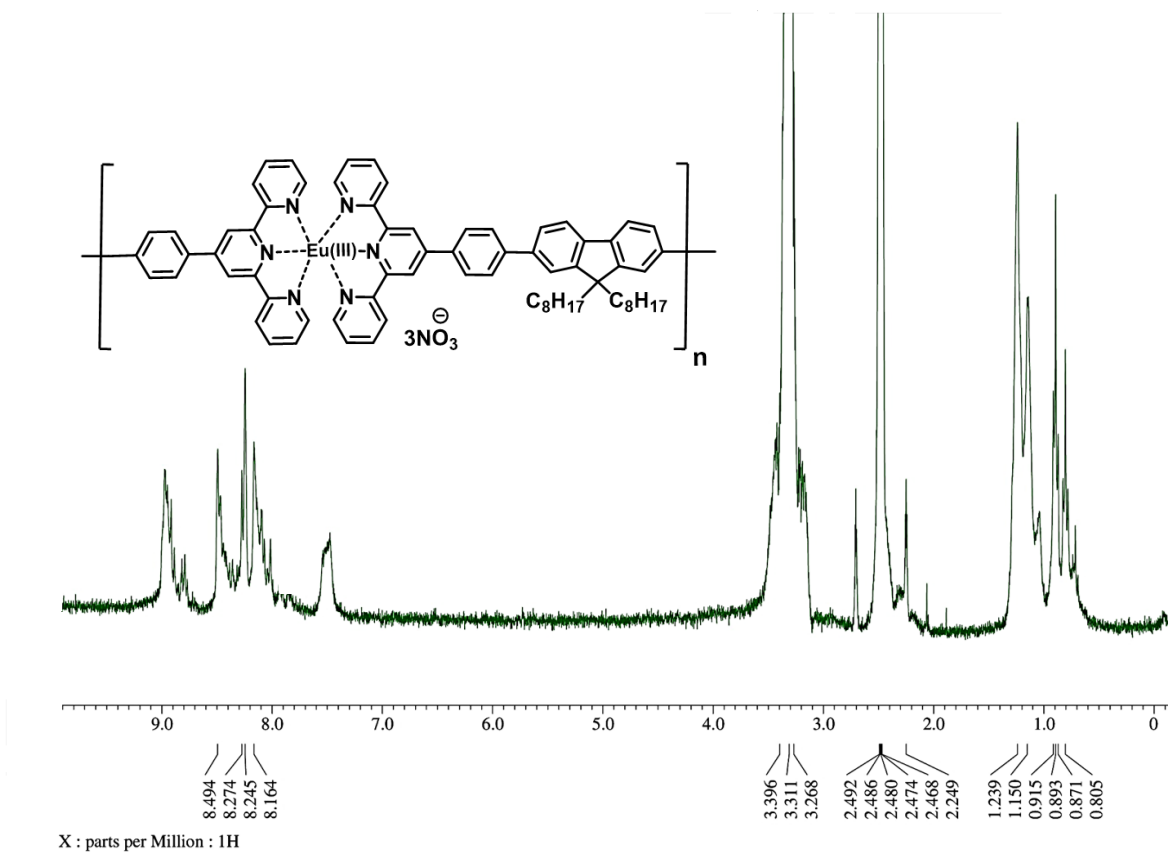

**Fig. S13.** <sup>1</sup>H NMR spectrum of PolyEu-2.

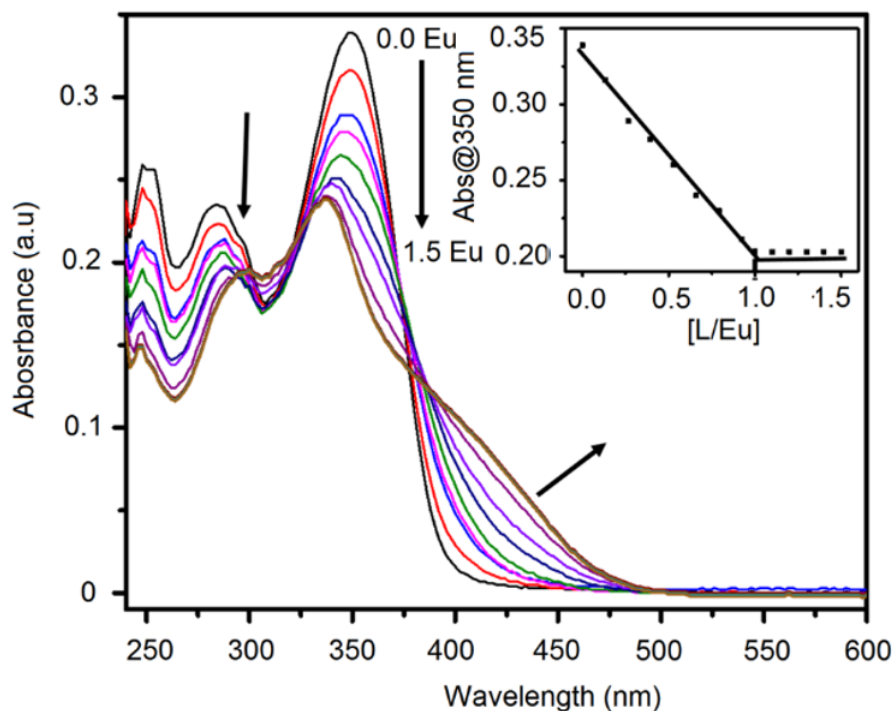

**Fig. S14.** a) The UV/Vis spectral change of L2 during the successive addition of  $\text{Eu}(\text{NO}_3)_3 \cdot 5\text{H}_2\text{O}$  (Inset: Absorption probed at 350 nm). ( Solvent-  $\text{CHCl}_3/\text{MeOH}$ , Concentration-  $5\mu\text{m}$ )

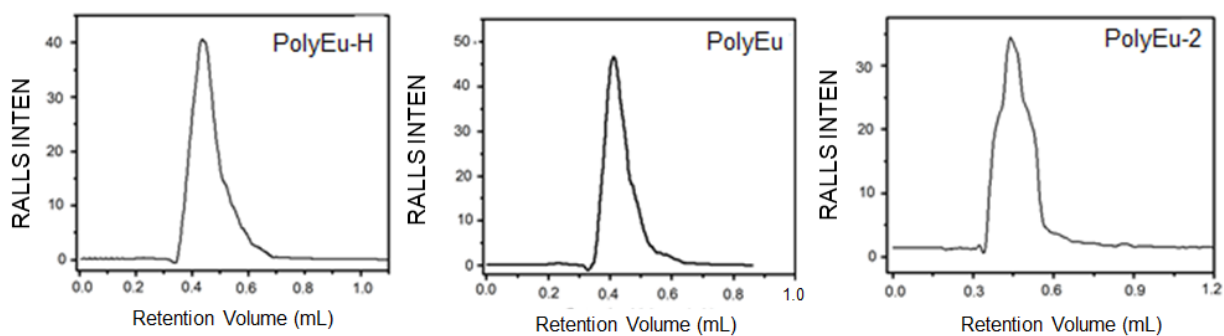

**Fig. S15.** The RALLS INTEN (INTEN = Intensity) change during the SEC-Viscometry-RALLS measurement of **PolyEu-H**, **PolyEu** and **PolyEu-2** in DMSO at room temperature.

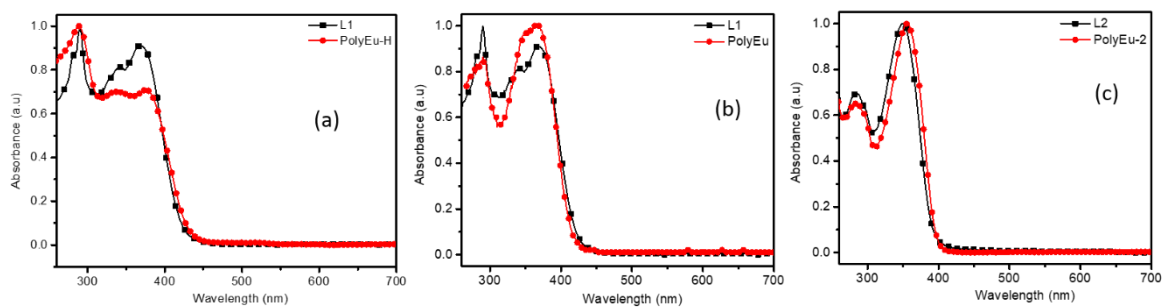

**Fig. S16.** a) The UV/Vis spectral change of ligands with their corresponding polymers in DMSO solvent (Normalized to 0-1). Concentration is  $\sim 1.25$  mM

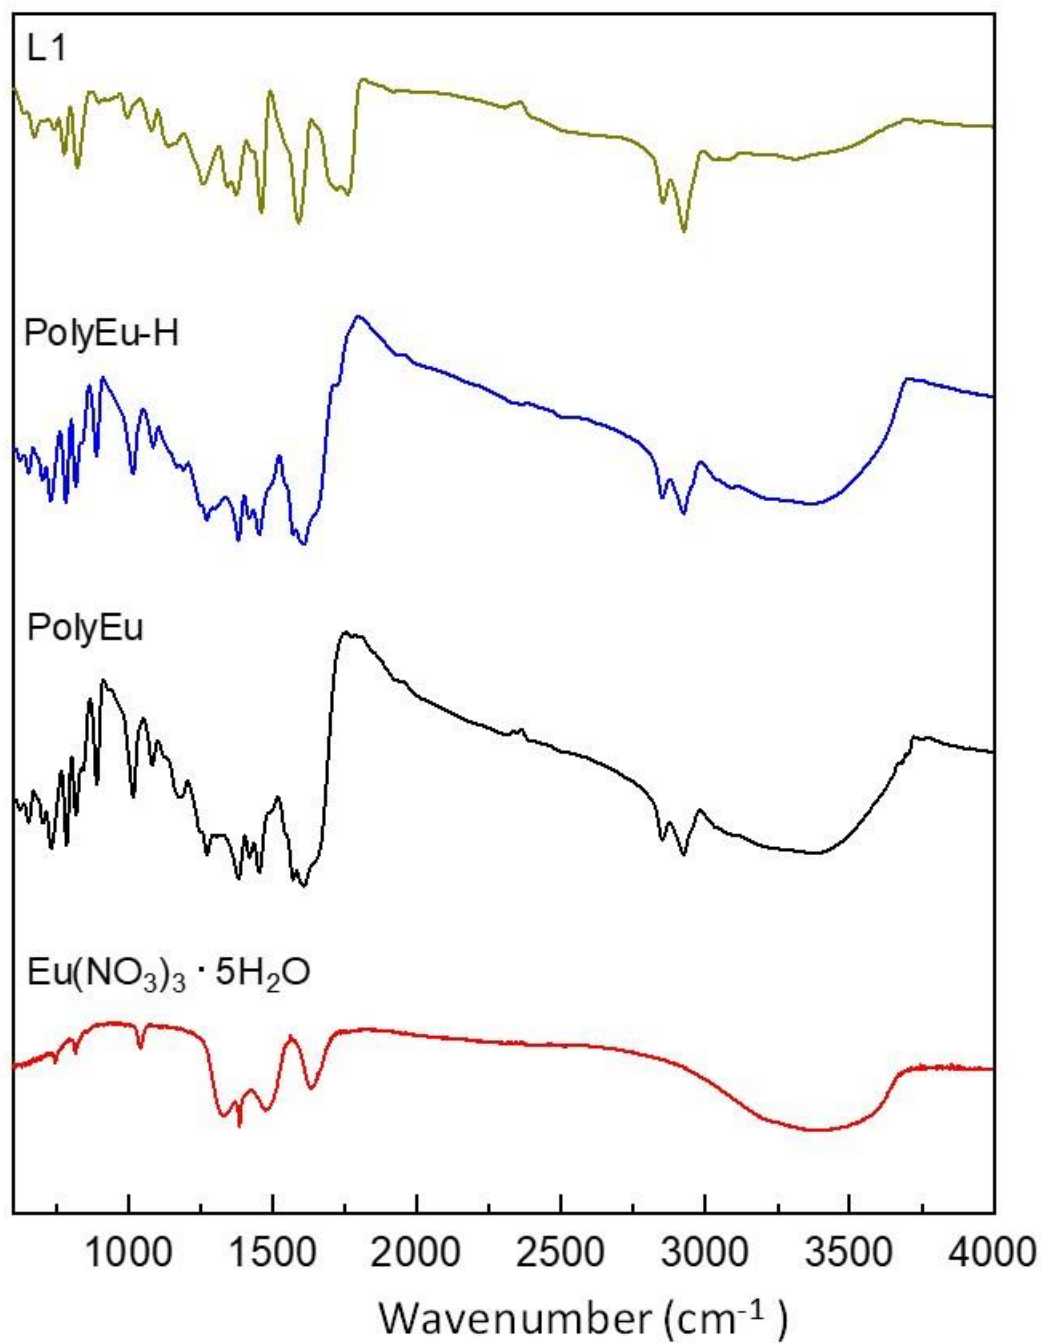

**Fig. S17.** FT-IR Spectra of L1, **PolyEu-H**, **PolyEu** and Eu(NO<sub>3</sub>)<sub>3</sub>·5H<sub>2</sub>O

We showed FT-IR spectrum in the range of 600-2000 cm<sup>-1</sup> in Fig. S17. We observe almost no difference in the fingerprint region of COOH (3700-2200).

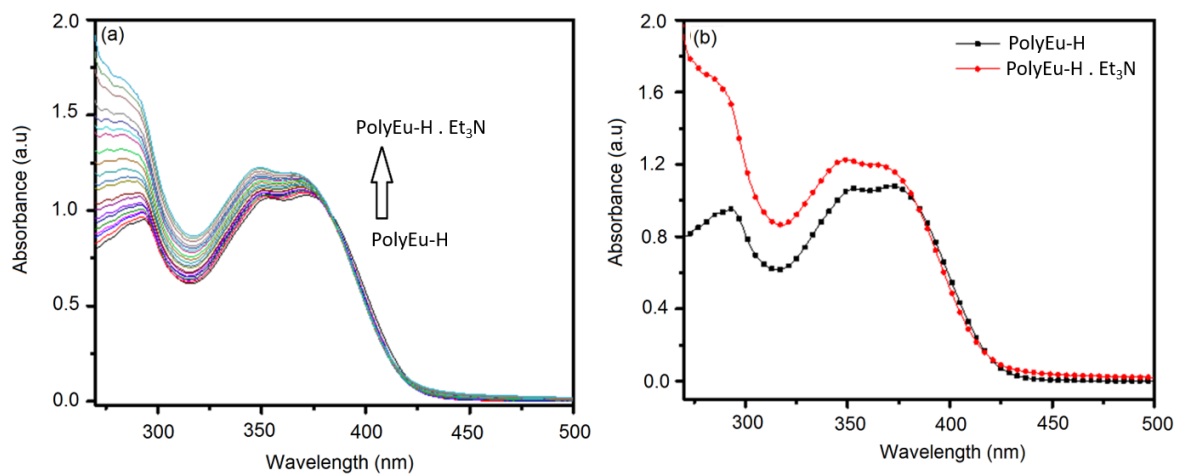

**Fig. S18.** Absorption changes of **PolyEu-H** on addition of triethylamine a) Absorption b) first and last spectrum of (a).

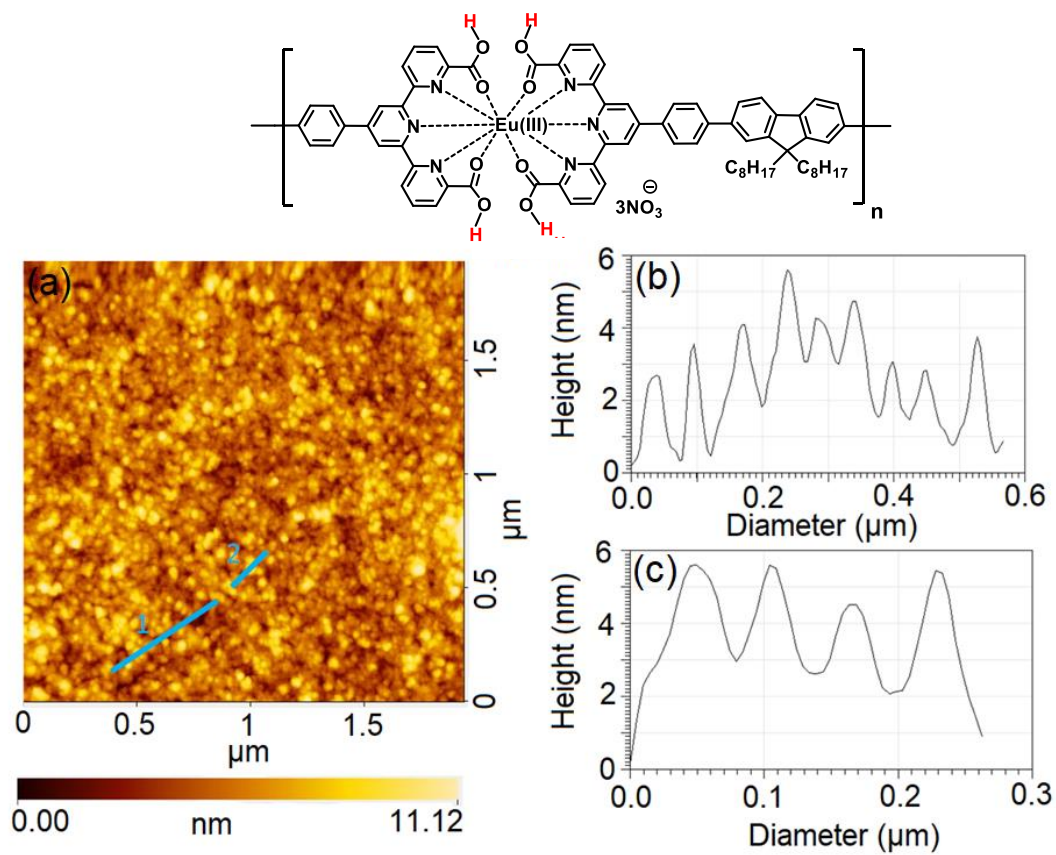

**Fig. S19.** a) AFM image of **PolyEu-H** b) and c) Diameter and height profile of line 1 and line 2 showed in fig a, respectively.

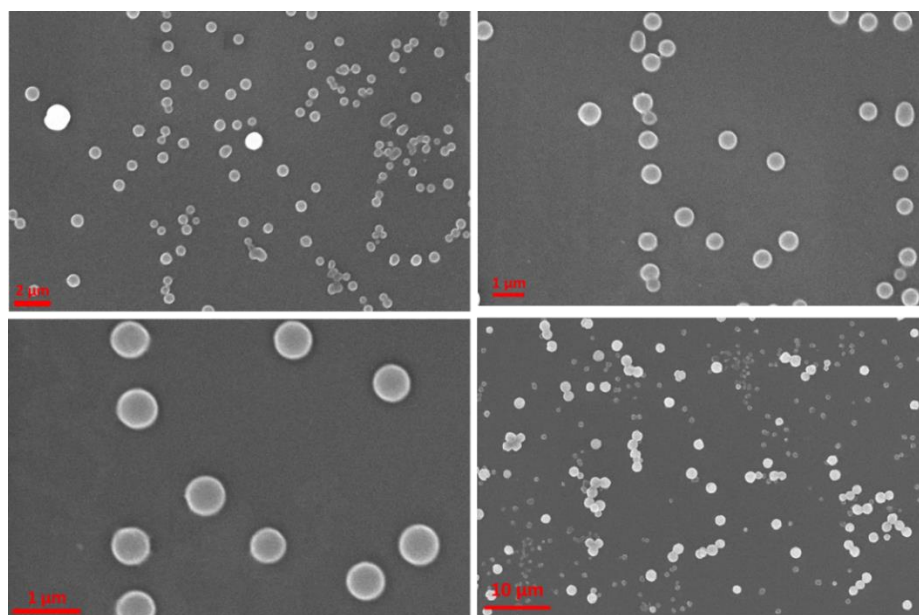

**Fig. S20.** a) Various magnified SEM images of **PolyEu-H**.

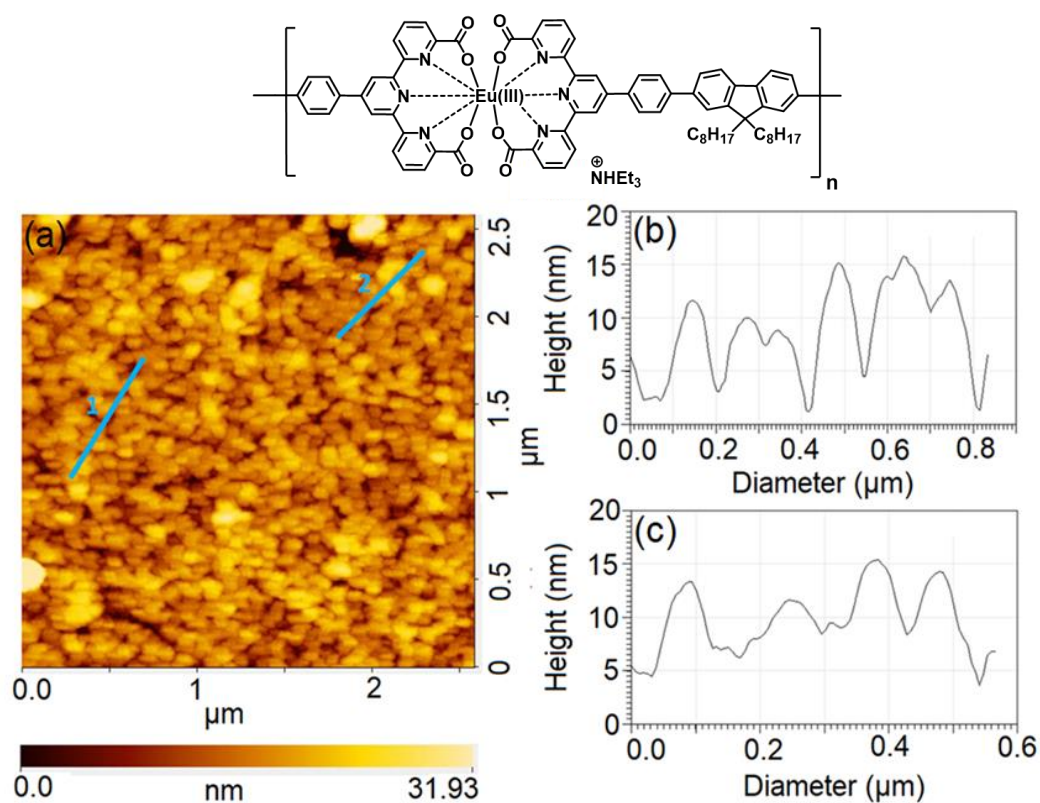

**Fig. S21.** a) AFM image of **PolyEu** b) and c) Diameter and height profile of line 1 and line 2 showed in fig a, respectively.

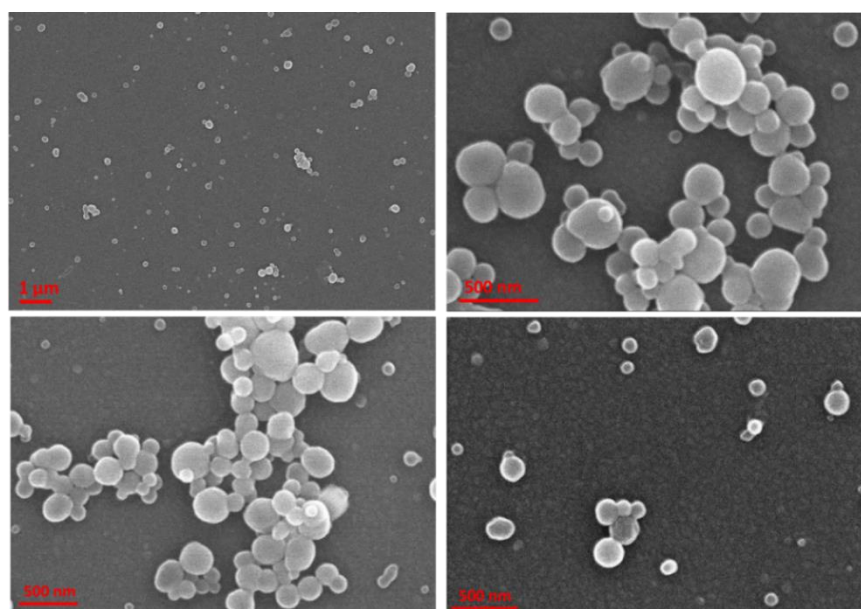

**Fig. S22.** a) Various magnified SEM images of **PolyEu**.

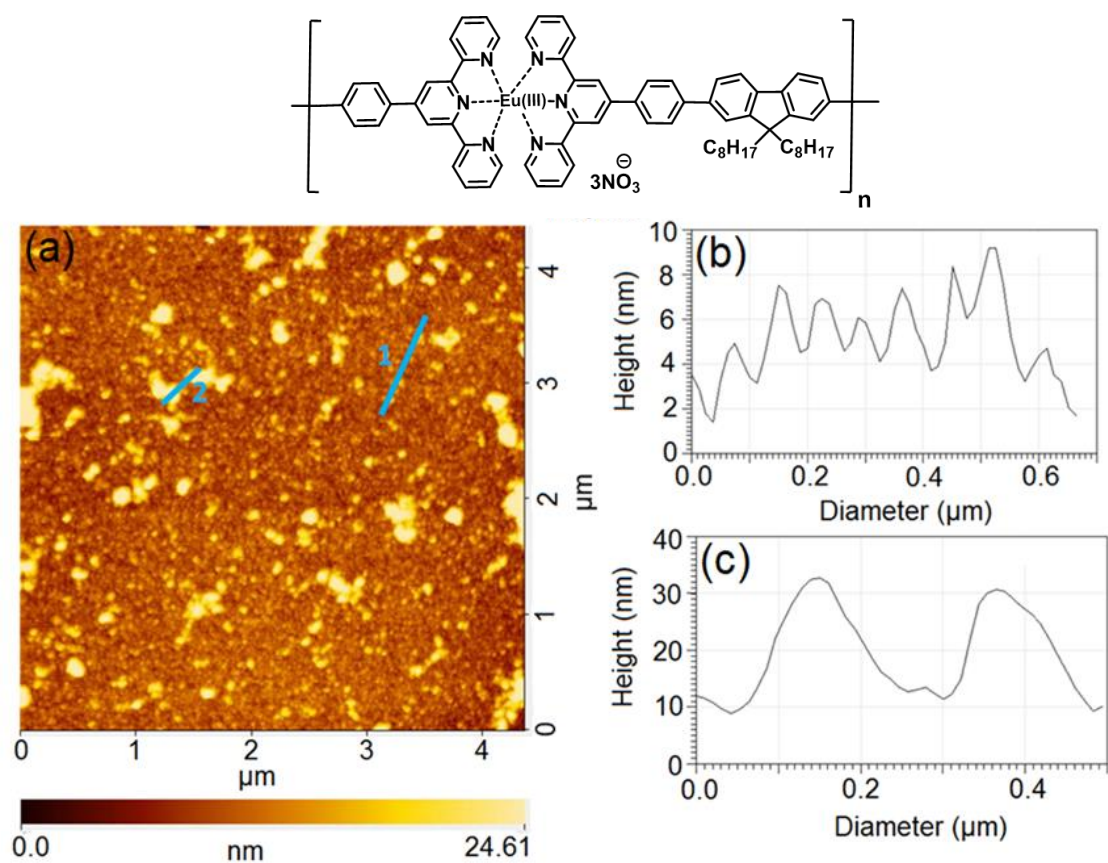

**Fig. S23.** a) AFM image of **PolyEu-2** b) and c) Diameter and height profile of line 1 and line 2 showed in fig a, respectively.

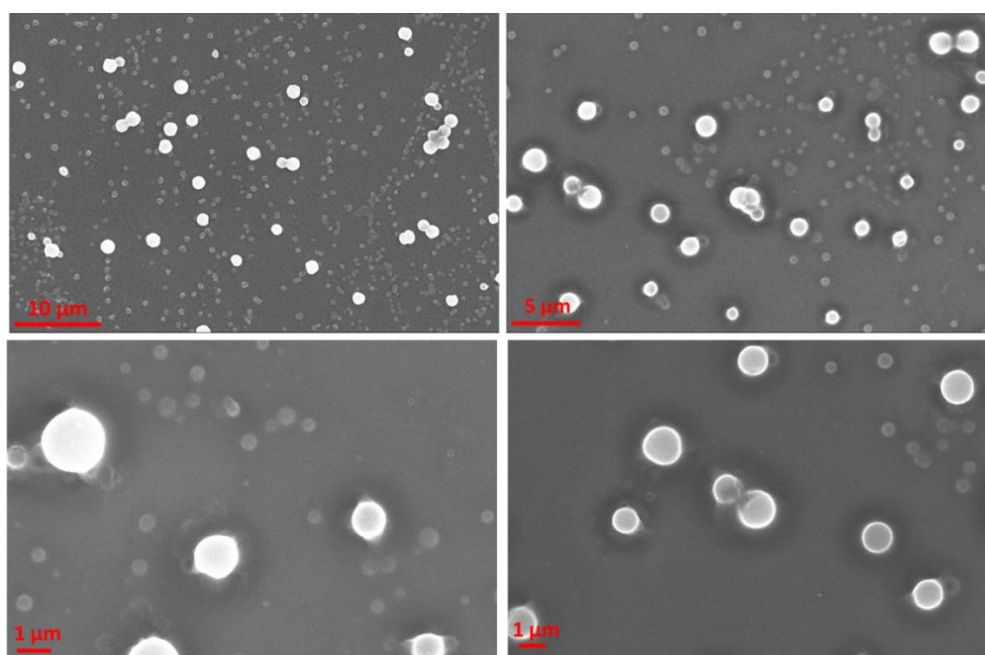

**Fig. S24.** Various magnified SEM images of **PolyEu-2**.



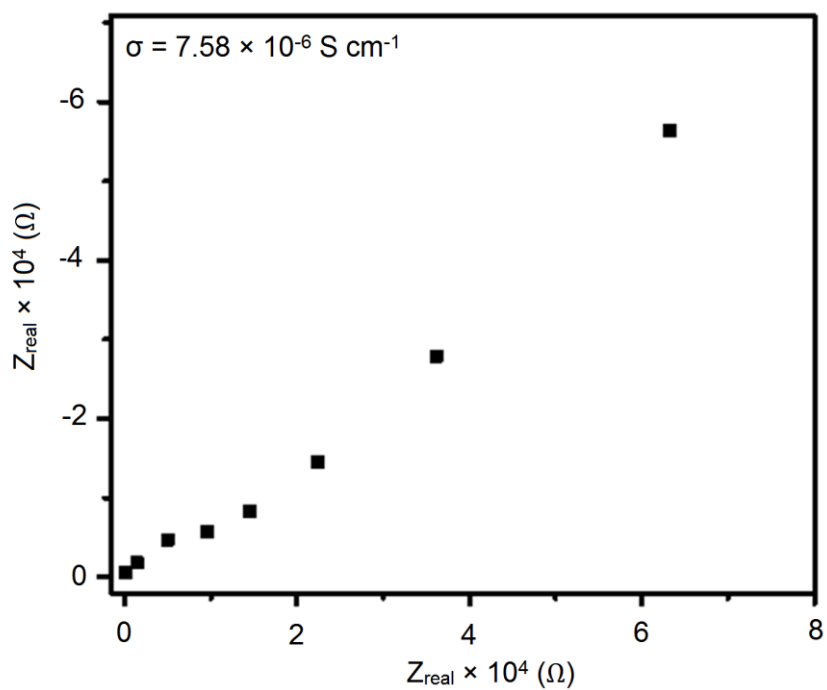

**Fig. S25.** The Nyquist plot for proton conductivity of **PolyEu** at 95% RH and 25 °C condition.

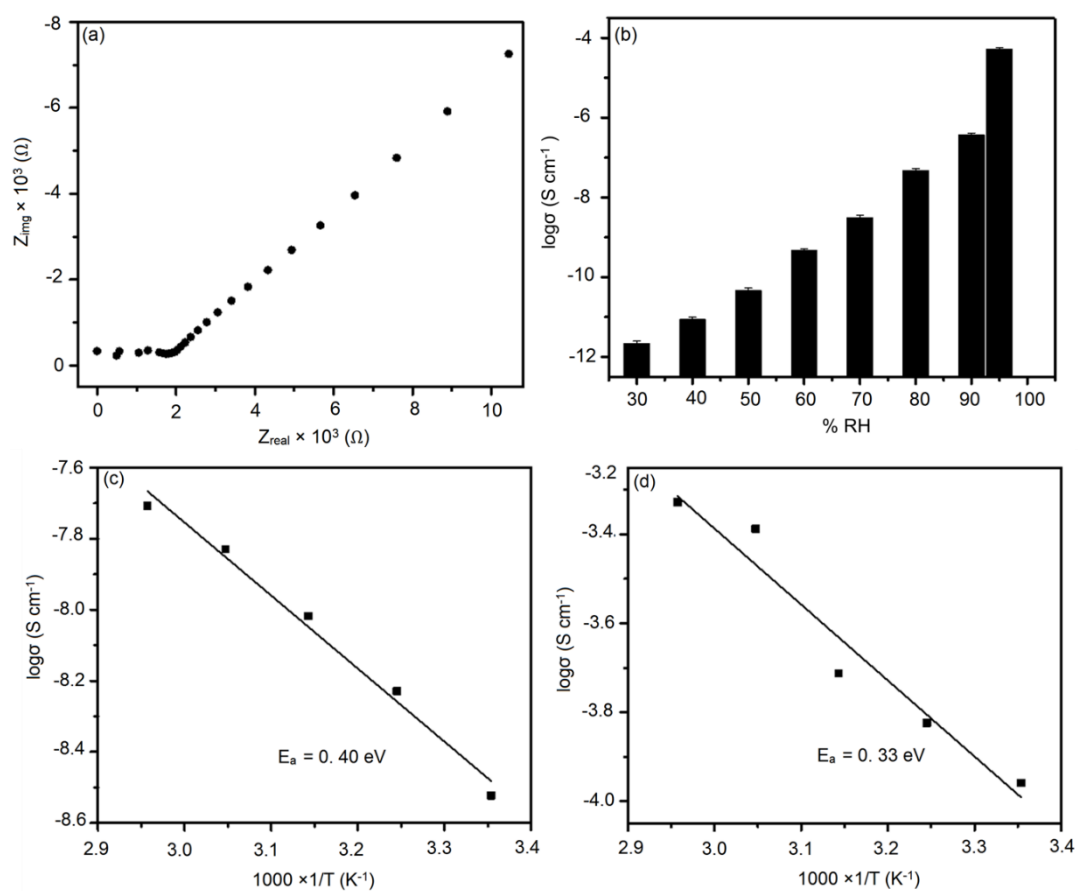

**Fig. S26.** a) The Nyquist plots for proton conductivity at 25 °C and 95% RH for **PolyEu-2** (frequency range: 1Hz to 30 MHz). b) Relation between the log (conductivity) and relative humidity of **PolyEu-2**. c) and d) Activation energy determination at 70% RH and 95% RH from Arrhenius plots for **PolyEu-2**.

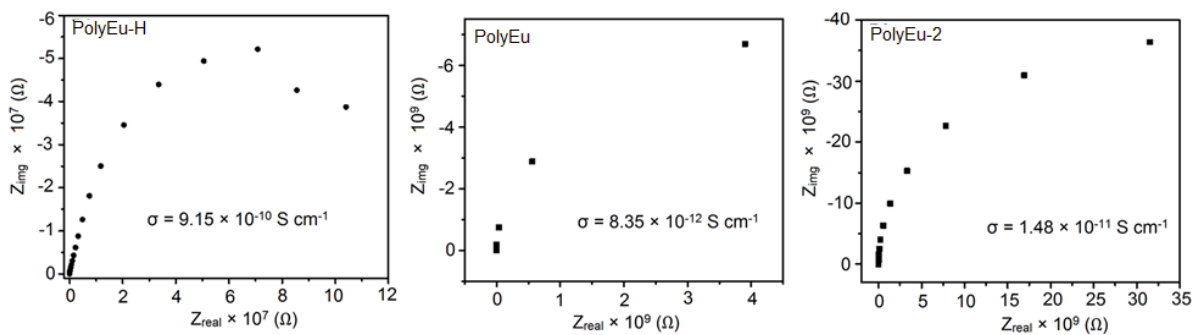

**Fig. S27.** The Nyquist plot for proton conductivity of (**polyEu-H**, **PolyEu**, and **PolyEu-2**) at 30% RH and 25 °C conditions.

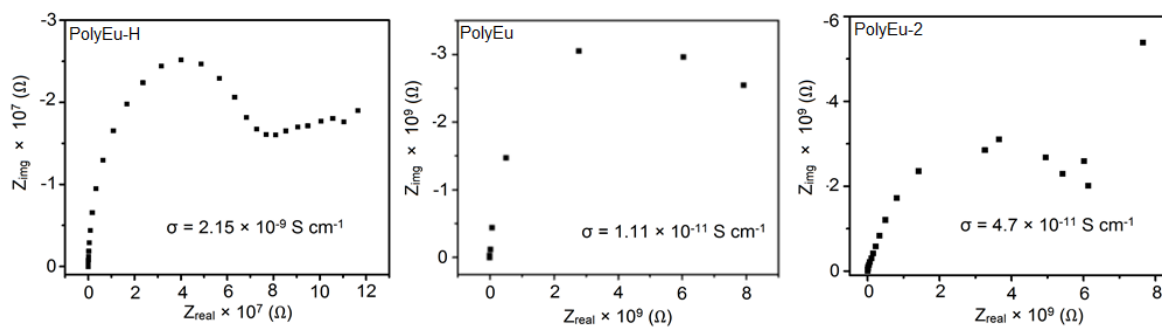

**Fig. S28.** The Nyquist plots for proton conductivity of (**polyEu-H**, **PolyEu**, and **PolyEu-2**) at 50% RH and 25 °C.

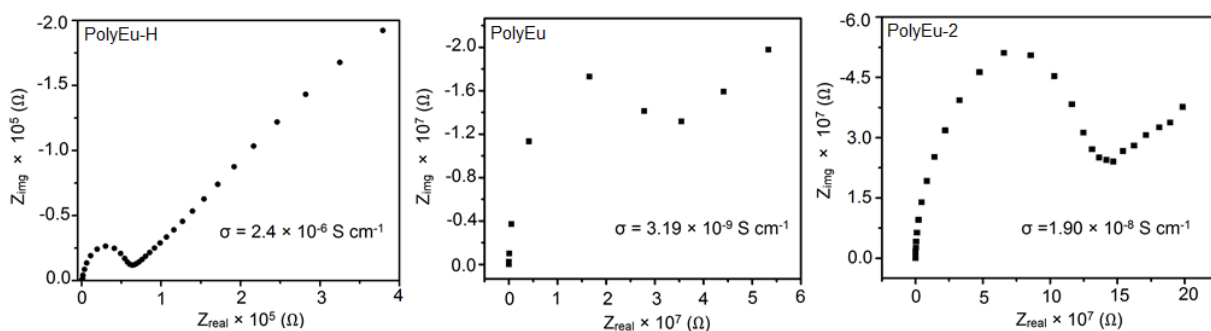

**Fig. S29.** The Nyquist plots for proton conductivity of (**polyEu-H, PolyEu and PolyEu-2**) at 70% RH and 25 °C.

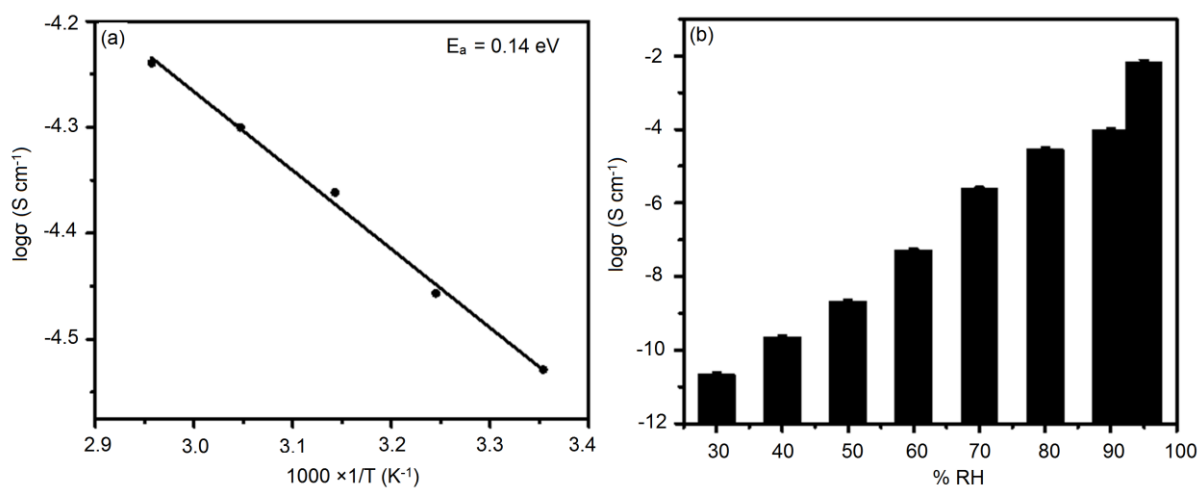

**Fig. S30.** a) Activation energy determination at 70% RH from Arrhenius plots for **PolyEu**. b) The relation between the log (conductivity) and relative humidity of **PolyEu**.

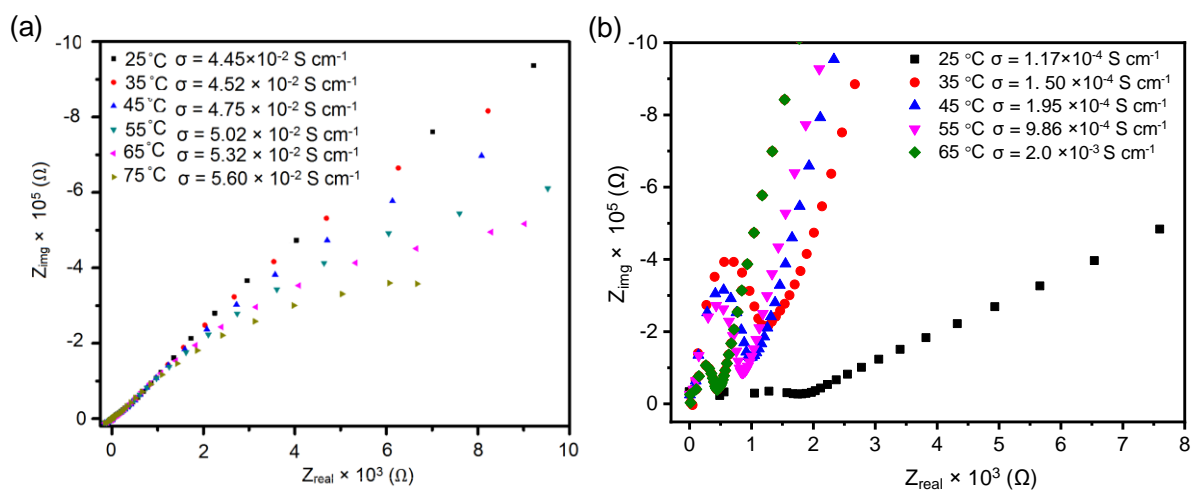

**Fig. S31.** The Nyquist plots for proton conductivity of **PolyEu-H** and **PolyEu-2** at 95% RH with different temperatures. a) **PolyEu-H** b) **PolyEu-2**.

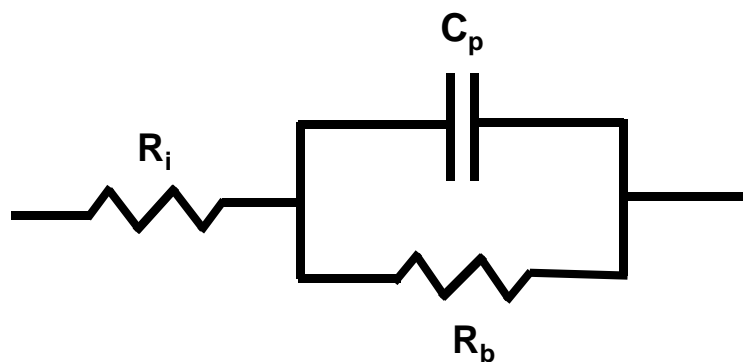

**Fig. S32.** Equivalent circuit used for fitting the impedance data from the Nyquist plots

The Nyquist plot is not having semicircle, following equivalent circuit fitting is used to the impedance data (Fig. S32).

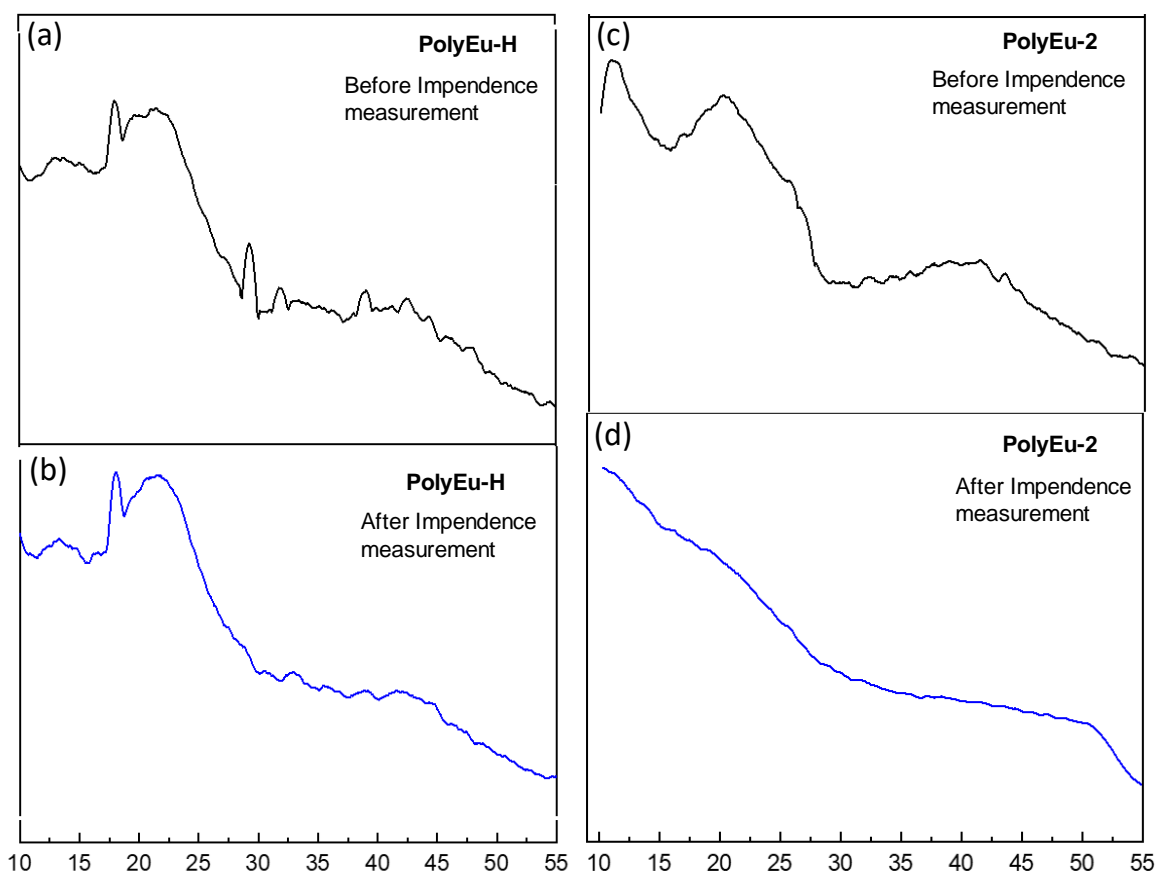

**Fig. S33.** The powder X-RD data of **PolyEu-H** and **PolyEu-2** before and after the impedance measurement a) **PolyEu-H** b) **PolyEu-2**

Fig.S33a showed the powder X-RD pattern of PolyEu-H before the impedance measurement.it is mostly like amorphous in nature. Fig. S33b showed X-RD pattern of PolyEu-H after the impedance measurement. There are no sharp peaks appeared. This result indicates crystallinity and decomposition of polymer not happened during the impedance measurement. Similarly, we also showed the powder X-RD pattern of polyEu-2 as a Fig. S33c (before the measurement) and d (after the measurement). We did not observe any kind of sharp peaks in Fig.33d. This clearly indicates polymer decomposition does not happened.

**Table S1.** Proton Conduction values of some reported porous crystalline Frameworks.

| Compounds                                                                                                              | Conductivity (S cm <sup>-1</sup> ) | Conditions           | References                                                  |
|------------------------------------------------------------------------------------------------------------------------|------------------------------------|----------------------|-------------------------------------------------------------|
| HOF-GS-11                                                                                                              | 1.8 × 10 <sup>-2</sup>             | 25 °C, 95% RH        | <i>Angew. Chem. Int. Ed.</i> <b>2016</b> , 55, 10667–10671. |
| Fe-CAT-5                                                                                                               | 5.0 × 10 <sup>-2</sup>             | 25 °C, 98% RH        | <i>J. Am. Chem. Soc.</i> <b>2015</b> , 137, 15394–15397.    |
| [(Me <sub>2</sub> NH <sub>2</sub> ) <sub>3</sub> (SO <sub>4</sub> ) <sub>2</sub> ][Zn <sub>2</sub> (ox) <sub>3</sub> ] | 4.2 × 10 <sup>-2</sup>             | 25 °C, 98% RH        | <i>Angew. Chem. Int. Ed.</i> <b>2014</b> , 53, 2638–2642.   |
| (NH <sub>4</sub> ) <sub>2</sub> (H <sub>2</sub> adp)[Zn <sub>2</sub> (ox) <sub>3</sub> ]·3H <sub>2</sub> O             | 8.0 × 10 <sup>-3</sup>             | 25 °C, 98% RH        | <i>J. Am. Chem. Soc.</i> <b>2009</b> , 131, 9906-9907.      |
| Ca-PiPhtA-NH <sub>3</sub>                                                                                              | 6.6 × 10 <sup>-3</sup>             | 24 °C, 98% RH        | <i>J. Am. Chem. Soc.</i> <b>2014</b> , 136, 5731–5739.      |
| Cu-TCPP nano-sheet                                                                                                     | 3.9 × 10 <sup>-3</sup>             | 25 °C, 98% RH        | <i>J. Am. Chem. Soc.</i> <b>2013</b> , 135, 7438-7441.      |
| CB[6]·1.2H <sub>2</sub> SO <sub>4</sub> ·6.4H <sub>2</sub> O (Organic based)                                           | 1.3 × 10 <sup>-3</sup>             | 25 °C, 98% RH        | <i>Angew. Chem. Int. Ed.</i> , <b>2011</b> , 34, 7870-7873. |
| CB[6]·1.1 HCl·11.3H <sub>2</sub> O (Organic based)                                                                     | 1.1 × 10 <sup>-3</sup>             | 25 °C, 98% RH        | <i>Angew. Chem. Int. Ed.</i> , <b>2011</b> , 34, 7870-7873. |
| PA@Tp-Azo (Organic based)                                                                                              | 9.9 × 10 <sup>-4</sup>             | 25 °C, 98% RH        | <i>J. Am. Chem. Soc.</i> <b>2014</b> , 136, 6570-6573.      |
| <b>PolyEu-H</b>                                                                                                        | <b>4.4 × 10<sup>-2</sup></b>       | <b>25 °C, 95% RH</b> | <b>This Work</b>                                            |

**Table S2.** Some known porous crystalline materials with very low activation energies.

| <b>Compounds</b>                                                                                                                                                         | <b>E<sub>a</sub><br/>(eV)</b> | <b>References</b>                                             |
|--------------------------------------------------------------------------------------------------------------------------------------------------------------------------|-------------------------------|---------------------------------------------------------------|
| HOF-GS-11                                                                                                                                                                | 0.13                          | <i>Angew. Chem. Int. Ed.</i> <b>2016</b> , 55, 10667–10671    |
| HPF2–100                                                                                                                                                                 | 0.10                          | <i>Adv. Mater. Interfaces</i> <b>2015</b> , 2, 1500301        |
| PA@Tp-Azo                                                                                                                                                                | 0.11                          | <i>J. Am. Chem. Soc.</i> <b>2014</b> , 136, 6570-6573.        |
| H+@Ni <sub>2</sub> (dobdc)(H <sub>2</sub> O)<br>2 (pH = 1.8)                                                                                                             | 0.14                          | <i>Angew. Chem. Int. Ed.</i> <b>2014</b> , 53, 8383–8387.     |
| PCMOF-5                                                                                                                                                                  | 0.16                          | <i>J. Am. Chem. Soc.</i> <b>2013</b> , 135, 1193-1196.        |
| TfOH@MIL-101<br>0.18                                                                                                                                                     | 0.18                          | <i>ACS Appl. Mater. Interfaces</i> <b>2014</b> , 6, 5161-5167 |
| [{(Zn <sub>0.25</sub> ) <sub>8</sub> (O)}Zn <sub>6</sub> (L)<br>12(H <sub>2</sub> O) <sub>29</sub><br>(DMF) <sub>69</sub> (NO <sub>3</sub> ) <sub>2</sub> ] <sub>n</sub> | 0.22                          | <i>J. Am. Chem. Soc.</i> <b>2012</b> , 134, 19432–19437.      |
| <b>PolyEu-H</b>                                                                                                                                                          | <b>0.04</b>                   | <b>This Work</b>                                              |



**Table S3.** Proton Conduction and activation energies of some reported europium-based MOFs.

| Compounds                                                                                                                               | Conductivity (S cm <sup>-1</sup> )     | $E_a$ (eV)  | Conditions           | References                                        |
|-----------------------------------------------------------------------------------------------------------------------------------------|----------------------------------------|-------------|----------------------|---------------------------------------------------|
| Eu-MOF                                                                                                                                  | $1.0 \times 10^{-5}$                   | 0.91        | 25 °C, 97% RH        | <i>Chem. Commun.</i> <b>2014</b> , 50, 1912       |
| Eu-MOF                                                                                                                                  | $1.1 \times 10^{-3}$                   | 0.97        | 100 °C, 68% RH       | <i>Chem. Commun.</i> <b>2014</b> , 50, 9153       |
| Me <sub>2</sub> NH <sub>2</sub> ][Eu(ox) <sub>2</sub> (H <sub>2</sub> O)]3H <sub>2</sub> O                                              | $2.73 \times 10^{-3}$                  | 0.39        | 55 °C, 95% RH        | <i>J. Mater. Chem. A</i> , <b>2016</b> , 4, 16484 |
| (N <sub>2</sub> H <sub>5</sub> )[CeEu(C <sub>2</sub> O <sub>4</sub> ) <sub>4</sub> (N <sub>2</sub> H <sub>5</sub> )]·4 H <sub>2</sub> O | $3.42 \times 10^{-3}$                  | 0.10        | 25 °C, 100% RH       | <i>Adv. Mater.</i> <b>2017</b> , 29, 1701804      |
| [Ln(H <sub>4</sub> fNMP)-(H <sub>2</sub> O) <sub>2</sub> ]Cl·2H <sub>2</sub> O                                                          | $2.0 \times 10^{-3}$                   | 0.30        | 80 °C, 95% RH        | <i>Inorg. Chem.</i> <b>2016</b> , 55, 7414        |
| <b>PolyEu-H</b>                                                                                                                         | <b><math>5.6 \times 10^{-2}</math></b> | <b>0.04</b> | <b>75 °C, 95% RH</b> | <b>This Work</b>                                  |
